# Supplementary material for: Identification and validation of SLCO4C1 as a biological marker in hepatocellular carcinoma based on anoikis classification features
Source: publisher site journal article supplement (doi:10.18632/aging.205438), 2024-01-15
Supplement: Supplementary file [file aging-v16i2-205438-supplementary-material-SD1.pdf]

## SUPPLEMENTARY FIGURE

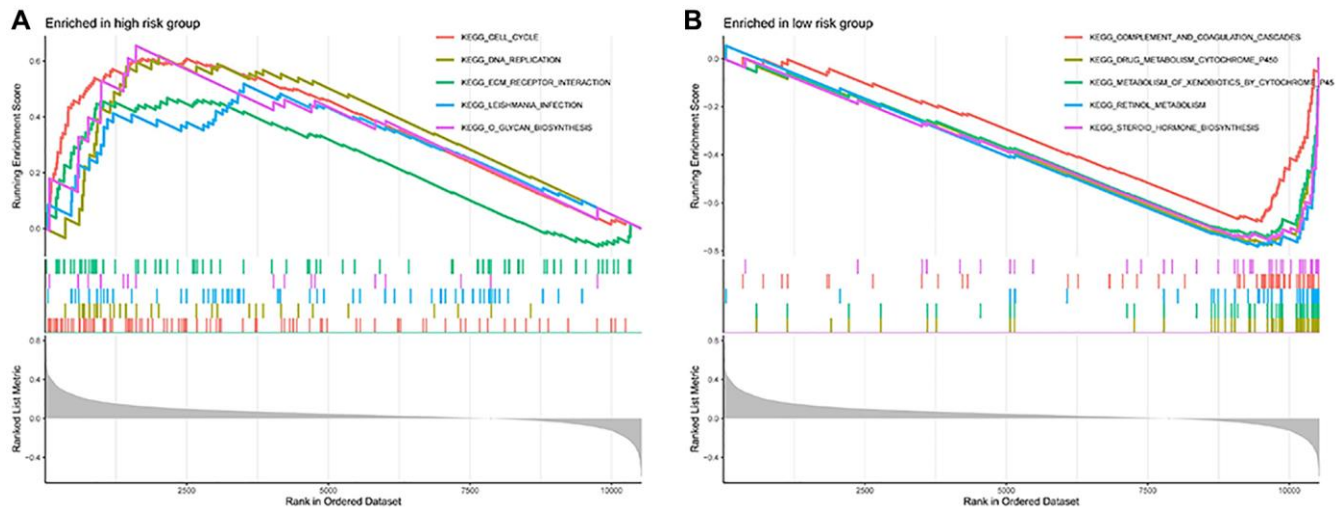

Supplementary Figure 1. (A, B) Enrichment map for gene collection enrichment analysis of high-risk and low-risk groups.
